# Supplementary material
Source: Research Square preprint supplement (doi:10.21203/rs.3.rs-9294400/v1)
Supplement: Supplementary file 1 [file 380b3f41266b376bc5d5f94c.docx]

**Table S1**. Primers sequences for real-time PCR used in this study.

| **Primer name** | **Sequences (5’-3’)** | | **Purpose** |
| --- | --- | --- | --- |
| ROR-F  ROR-R  ROR-F  ROR-R  PRKD3-F  PRKD3-R  β-actin-F  β-actin-R  GAPDH-F  GAPDH-R | CATTTTCCATCCTGCTGTTCAGAGT  GGCTCTTTCTCTCCTGTGGTTTCAT  GATGGCATTGTCGCTAAGTAAGAA  TTTCATTGTCCTGGGGTGTTC  AGATGCTCTGGGGATTGGTACG  GGGAAGGGCTACATATTCAGGCT  CATGTACGTTGCTATCCAGGC  CTCCTTAATGTCACGCACGAT  GTCTCCTCTGACTTCAACAGCG  ACCACCCTGTTGCTGTAGCCAA | RT-PCR  RT-PCR  qRT-PCR  qRT-PCR  qRT-PCR  qRT-PCR  qRT-PCR  qRT-PCR  qRT-PCR  qRT-PCR | |

**Table S2**. shRNA sequences used in this study.

| **Primer name** | **Sequences (5’-3’)** | | **Purpose** |
| --- | --- | --- | --- |
| LncRNA-ROR-sh1-F  LncRNA-ROR-sh1-R | TTGACAGTGAGCGCGCCTGAGAGTTGGCATGA  ATATAGTGAAGCCACAGATGTA  TCCGAGGCAGTAGGCAAGCCTGAGAGTTGG  CATGAATATACATCTGTGGCTTCA | shRNA Constructs  shRNA Constructs | |

**Table S3**. siRNA sequences used in this study.

| **Primer name** | **Sequences (5’-3’)** | | **Purpose** |
| --- | --- | --- | --- |
| PRKD3-siRNA  PRKD3-siRNA-Ctrl | GCCUUCAAGAUUCCAAAUAdTdT  ATCCACTACCGTTGTTATAGGTG | siPRKD3  Negative ctrl siRNA | |

**Table S4**. Primers sequences for CHIP used in this study.

| **Primer name** | **Sequences (5’-3’)** | | **Purpose** |
| --- | --- | --- | --- |
| PRKD3-P1  PRKD3-P2  PRKD3-P3  PRKD3-P4  PRKD3-P5  PRKD3-P6 | GAACGCAGTCAGAGGCATAGGC  TGATTGAAGACACAGTTACGTCCATG  ACCTTAGCAACATCCTCTGAGCAGTG  CGATAACGCAACTTGCCCAG  GTGGTGGGGTGGCATGTATT  CCTTGGCACTCTACACTGATACC | CHIP  CHIP  CHIP  CHIP  CHIP  CHIP | |
